# Supplementary material for: Far and Near Contrast Sensitivity and Quality of Vision with Six Presbyopia Correcting Intraocular Lenses
Source: MDPI journal article supplement (doi:10.3390/jcm11144150), 2022-07-17

**Supplementary File S1. Quality of vision questionnaire**

*(This questionnaire, as displayed here, has been translated from Spanish to English for the purposes of this publication)*

1. Please describe how often do you need to use spectacles to perform far vision tasks

|       |           |        |
|-------|-----------|--------|
| Never | Sometimes | Always |
|-------|-----------|--------|

2. Please describe how often do you need to use spectacles to perform intermediate vision tasks (about 60-70 cm)

|       |           |        |
|-------|-----------|--------|
| Never | Sometimes | Always |
|-------|-----------|--------|

3. Please describe how often do you need to use spectacles to perform near vision tasks (about 30-50 cm)

|       |           |        |
|-------|-----------|--------|
| Never | Sometimes | Always |
|-------|-----------|--------|

4. Please describe the intensity and discomfort of the halos you experience at night (please refer to the image to understand what halos are; 1 is low and 3 is high intensity and or discomfort)

|      |   |   |   |
|------|---|---|---|
| None | 1 | 2 | 3 |
|------|---|---|---|

5. Please describe the intensity and discomfort of the glare you experience at night (please refer to the image to understand what glare is; 1 is low and 3 is high intensity and or discomfort)

|      |   |   |   |
|------|---|---|---|
| None | 1 | 2 | 3 |
|------|---|---|---|

**Halos**

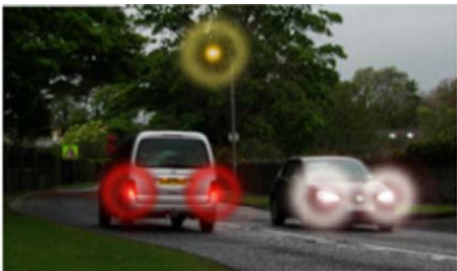

**Glare**

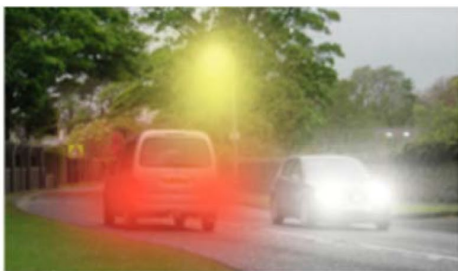

Supplement: s1 [file s1]
